# Supplementary material
Source: MDPI journal article supplement (https://www.mdpi.com/2073-4395/12/11/2753)
Supplement: s1 [file s1]

**Table S1** Primer sequences of quantitative real time PCR in this study.

| Gene    | Forward primer(5'-3')     | Reverse primer(5'-3')     |
|---------|---------------------------|---------------------------|
| ACTIN   | TTGTGTTGGATTCTGGTGATGGTGT | TTTCCCGTTCTGCTGTTGTTGTGAA |
| DcNAC6  | GCAGAGCTCAACTTACCCCC      | TGTCCCGAACATCGCCTTAT      |
| DcNAC16 | TCCTTCTCATCATCTTTTGCACA   | TAATCTCATACTCATTCTGTCACCG |
| DcNAC18 | GCTTCCGATTCCACCCCA        | ACCCTCACCAAAAACCGCTT      |
| DcNAC29 | GCCGCCTATCAACGCCT         | AAATACCATTCTTTCTGCCCA     |
| DcNAC42 | GCTACCTGAACCAGCCACAAC     | AAGGATCATTCCATTCCCAAAG    |
| DcNAC44 | GAAGAGTAATCAGGTGGTTGGTATG | GGGTAAGGAAGAGAGAGAGAGAGAG |
| DcNAC51 | GCCGCCATTTCCCATCA         | CTCCACTGCCCCATCTCCT       |
| DcNAC64 | GGATTACCCCTGTGGCTCTGG     | TCTCCCTTTTTTTTGTTCACCTTA  |
| DcNAC73 | GAAGAGTTTTGATGAGGTGGGAA   | TGATGTAGTATGGCTGAAATGGG   |
